# Supplementary material for: Myeloid Cell Arg1 Inhibits Control of Arthritogenic Alphavirus Infection by Suppressing Antiviral T Cells
Source: PubMed Central journal article supplement (PMC4593600; doi:10.1371/journal.ppat.1005191), 2015-10-05
Supplement: ppat.1005191.s008.pdf [file ppat.1005191.s008.pdf]

**Table S1. Primers used for gene expression analysis of human cells.**

| <b>Gene</b>  | <b>Forward Primer Sequence (5' → 3')</b> | <b>Reverse Primer Sequence (5' → 3')</b> |
|--------------|------------------------------------------|------------------------------------------|
| GAPDH        | CCACATCGCTCAGACACCAT                     | GGCAACAATATCCACTTTACCAGAGT               |
| Arg1         | TGGACAGACTAGGAATTGGCA                    | CCAGTCCGTCAACATCAAACCT                   |
| Nox1         | CTGCTTCCTGTGTGTCGCAA                     | AGGCAGATCATATAGGCCACC                    |
| IL-6         | CACAGACAGCCACTCACCTCTTCAGAACGA           | ACCAGTGATGATTTTCACCAGGCAAGTCTC           |
| IL-10        | GACTTTAAGGGTTACCTGGGTTG                  | TCACATGCGCCTTGATGTCTG                    |
| TGF- $\beta$ | GGCCAGATCCTGTCCAAGC                      | GTGGGTTTCCACCATTAGCAC                    |
